# Supplementary material for: Child Health Status and Health Care Use in Grandparent- Versus Parent-Led Households
Source: Oxford University Press journal article supplement (doi:10.1542/peds.2021-055291), 2022-08-01
Supplement: peds_2021055291supplementarydata.pdf [file peds_2021055291supplementarydata.pdf]

## Supplemental Informations

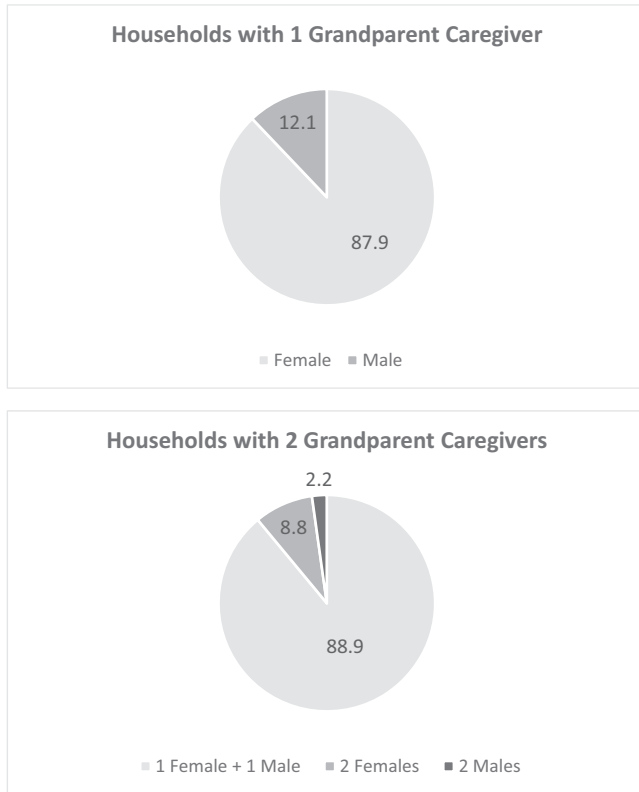

### SUPPLEMENTAL FIGURE 1

Caregiver Sex Among Grandparent-Led Households: National Survey of Children's Health, 2016-2019

**SUPPLEMENTAL TABLE 5** Survey Items Used in the Caregiving Experience Measures: 2016-2019 National Survey of Children’s Health

| Measures                                                          | Survey Items                                                                                                                                                                                                                                                                                                                                                                                                                                                                            | Response Options                                                                                                                                                                                                                          | Coding/Scoring Notes                                                                                                                                                                                                                                                                                          |
|-------------------------------------------------------------------|-----------------------------------------------------------------------------------------------------------------------------------------------------------------------------------------------------------------------------------------------------------------------------------------------------------------------------------------------------------------------------------------------------------------------------------------------------------------------------------------|-------------------------------------------------------------------------------------------------------------------------------------------------------------------------------------------------------------------------------------------|---------------------------------------------------------------------------------------------------------------------------------------------------------------------------------------------------------------------------------------------------------------------------------------------------------------|
| Emotional support                                                 | During the past 12 months, was there someone that you could turn to for day-to-day emotional support with parenting or raising children?                                                                                                                                                                                                                                                                                                                                                | Yes<br>No                                                                                                                                                                                                                                 | N/A                                                                                                                                                                                                                                                                                                           |
| Family resilience                                                 | When your family faces problems, how often are you likely to do each of the following?<br>Talk together about what to do<br>Work together to solve our problems<br><br>Know we have strengths to draw on<br><br>Stay hopeful even in difficult times                                                                                                                                                                                                                                    | All of the time<br>Most of the time<br>Some of the time<br>None of the time<br>All of the time<br>Most of the time<br>Some of the time<br>None of the time<br>All of the time<br>Most of the time<br>Some of the time<br>None of the time | Family resilience comprises 4 indicators. To meet each indicator, a response of either “Most of the time” or “All of the time” is required.<br>High = All or most of the time for all 4 indicators<br>Medium = All or most of the time for 2-3 indicators<br>Low = All or most of the time for 0-1 indicators |
| Handling demands of raising a child                               | How well do you think you are handling the day-to-day demands of raising children?                                                                                                                                                                                                                                                                                                                                                                                                      | Very well<br>Somewhat well<br>Not very well<br>Not well at all                                                                                                                                                                            | Very well versus Somewhat well, Not very well, or Not well at all                                                                                                                                                                                                                                             |
| Frustrated when getting health services for child                 | During the past 12 months, how often were you frustrated in your efforts to get services for this child?                                                                                                                                                                                                                                                                                                                                                                                | Never<br>Sometimes<br>Usually<br>Always                                                                                                                                                                                                   | Never versus Sometimes, Usually, or Always                                                                                                                                                                                                                                                                    |
| Received help coordinating care (among those who needed it)       | During the past 12 months, did anyone help you arrange or coordinate this child’s care among the different doctors or services that this child uses?                                                                                                                                                                                                                                                                                                                                    | Yes<br>No<br>Did not see more than 1 health care provider in the past 12 months                                                                                                                                                           | Drop “Did not see more than 1 ...” from denominator                                                                                                                                                                                                                                                           |
| Employment affected by child’s health (among employed caregivers) | Were you employed at least 50 out of the past 52 weeks?<br>Was [other caregiver] employed at least 50 out of the past 52 weeks?<br>During the past 12 months, have you or other family members...<br>Left a job or taken a leave of absence because of this child’s health or health conditions?<br>Cut down on the hours you work because of this child’s health or health conditions?<br>Avoided changing jobs because of concerns about maintaining health insurance for this child? | Yes<br>No<br>Yes<br>No<br>Yes<br>No<br>Yes<br>No                                                                                                                                                                                          | The first 2 items are used to identify households in which at least 1 caregiver was employed (denominator). Among these households, a “yes” response to any of the 3 indicators of coded as “Yes”                                                                                                             |
